# Supplementary material
Source: MDPI journal article supplement (https://www.mdpi.com/2071-1050/13/16/8781)
Supplement: s1 [file s1]

## Supplementary Information

### From Comparative and Statistical Assessments of Liveability and Health conditions of districts in Hong Kong towards Future City Development

Yan Ling Chi <sup>1</sup> and Hugo Wai Leung Mak <sup>1,2,3\*</sup>

1. Department of Geography, The University of Hong Kong, Pokfulam, Hong Kong, China; [u3546774@connect.hku.hk](mailto:u3546774@connect.hku.hk)

2. Department of Electrical and Electronic Engineering, The University of Hong Kong, Pokfulam, Hong Kong, China;

3. Department of Mathematics, The Hong Kong University of Science and Technology, Clear Water Bay, Kowloon, Hong Kong, China.

\* Correspondence: Mak, H.W.L.; [hwlmak@ust.hk](mailto:hwlmak@ust.hk)

**Table S1.** Details of the 21 liveability indicators and 9 health indicators in the LHI-HK framework (for the Hong Kong context).

#### (a) 6 categories of liveability indicators

| Categories | LHI-HK Indicators                                                                                                                                     | Sources of Data                         |
|------------|-------------------------------------------------------------------------------------------------------------------------------------------------------|-----------------------------------------|
| Education  | Educational characteristics<br>(Percentage of citizens having post-secondary education: degree-both sexes) (%)<br><i>((i) for both 2016 and 2019)</i> | Census and Statistics Department [1, 2] |
| Economy    | Median monthly household income from all households (HK\$) <i>((i) for both 2016 and 2019)</i>                                                        | Census and Statistics Department [1, 2] |
|            | Labor force participation rate (%)<br><i>((ii) for both 2016 and 2019)</i>                                                                            | Census and Statistics Department [1, 2] |
|            | Poverty rate (%)<br><i>((ii) for both 2016 and 2019)</i>                                                                                              | Census and Statistics Department [3, 4] |
|            | Working hours (% of people with 45–54 hours, 55–64 hours, and over 65 hours of working hours)<br><i>((ii) for 2016; (iii) for 2019)</i>               | Census and Statistics Department [5]    |
| Housing    | Median floor area of accommodation (m <sup>2</sup> )<br><i>((ii) for 2016; (iii) for 2019)</i>                                                        | Census and Statistics Department [5]    |
|            | Median rent to income ratio (%)<br><i>((ii) for both 2016 and 2019)</i>                                                                               | Census and Statistics Department [5, 6] |
|            | Proportion of domestic households owning the quarters they occupy (%)<br><i>((i) for both 2016 and 2019)</i>                                          | Census and Statistics Department [5, 6] |

|                                   |                                                                                                                                                                                                                                                                            |                                                           |
|-----------------------------------|----------------------------------------------------------------------------------------------------------------------------------------------------------------------------------------------------------------------------------------------------------------------------|-----------------------------------------------------------|
| <b>Transport/<br/>Walkability</b> | Proportion of working population with place of work in the same district of residence (%)<br><i>((i) for both 2016 and 2019)</i>                                                                                                                                           | Census and Statistics Department [5, 6]                   |
|                                   | Walking as main mode of transport to place of work (for working population with fixed place of work) (% of working population using walking as main mode of transport to place of work, given that their place of work is fixed)<br><i>((ii) for 2016; (iii) for 2019)</i> | Census and Statistics Department & Centamap [7]           |
| <b>Environment</b>                | Population density (people/km <sup>2</sup> )<br><i>((ii) for both 2016 and 2019)</i>                                                                                                                                                                                       | Census and Statistics Department [5, 8]                   |
|                                   | Number of old and valuable trees<br><i>((iii) for 2016; (i) for 2019)</i>                                                                                                                                                                                                  | Development Bureau [9]                                    |
|                                   | Noise pollution (% of people exposed to traffic noise exceeding 70dB)<br><i>((iii) for 2016, (ii) for 2019)</i>                                                                                                                                                            | Environmental Protection Department [10]                  |
|                                   | Number of greening and landscape assets<br><i>((iii) for 2016; (i) for 2019)</i>                                                                                                                                                                                           | Development Bureau [11]                                   |
|                                   | PM <sub>2.5</sub> concentration (µg/m <sup>3</sup> )<br><i>((ii) for both 2016 and 2019)</i>                                                                                                                                                                               | Environmental Protection Department & HKUST ENVF [12, 13] |
|                                   | NO <sub>2</sub> concentration (µg/m <sup>3</sup> )<br><i>((ii) for both 2016 and 2019)</i>                                                                                                                                                                                 | Environmental Protection Department & HKUST ENVF [12, 13] |
|                                   | O <sub>3</sub> concentration (µg/m <sup>3</sup> )<br><i>((ii) for both 2016 and 2019)</i>                                                                                                                                                                                  | Environmental Protection Department & HKUST ENVF [12, 13] |
|                                   | Average temperature (°C)<br><i>((ii) for both 2016 and 2019)</i>                                                                                                                                                                                                           | Environmental Protection Department & HKUST ENVF [13]     |

|                          |                                                                                                                                                                                                                         |                                                                                             |
|--------------------------|-------------------------------------------------------------------------------------------------------------------------------------------------------------------------------------------------------------------------|---------------------------------------------------------------------------------------------|
| <b>Health Facilities</b> | Number of hospitals, specialist outpatient clinics, and general outpatient clinics under the Hospital Authority (HA)<br><i>((i) for both 2016 and 2019)</i>                                                             | Hospital Authority [14, 15]                                                                 |
|                          | Total length of walking tracks (m)<br><i>((iii) for 2016; (i) for 2019)</i>                                                                                                                                             | Leisure and Cultural Services Department [16]                                               |
|                          | Total number of sports facilities (including badminton courts, basketball courts, fitness rooms, grass pitches, hard-surface pitches, swimming pools, and table tennis courts)<br><i>((iii) for 2016; (i) for 2019)</i> | Hong Kong Geodata Store, with reference to Leisure and Cultural Services Department [17-23] |

*(i) Proportion to the Largest Value (P.L.V.) approach; (ii) Standard Score Approach (S.S.A.) approach; (iii) Standard Score Approach (S.S.A.), followed by either P.L.V. or S.S.A.*

#### **(b) 9 Official Health Indicators of Hong Kong**

| <b>Categories</b>                     | <b>LHI-HK Indicators</b>                                                                     | <b>Sources of Data</b>    |
|---------------------------------------|----------------------------------------------------------------------------------------------|---------------------------|
| <b>Physical Health</b><br><i>(ii)</i> | Averaged death statistics from 2016 to 2018                                                  | Department of Health [24] |
|                                       | Averaged death statistics (external causes) from 2016 to 2018                                | Department of Health [25] |
|                                       | Number of specialist outpatient (clinical) attendances by major specialty and cluster/clinic | Hospital Authority [26]   |
|                                       | Number of general outpatient attendances by cluster/clinic                                   | Hospital Authority [27]   |
|                                       | Family medicine specialist clinic attendance by cluster/clinic                               | Hospital Authority [27]   |
|                                       | Number of patient days by cluster/hospital during the 2019-2020 period                       | Hospital Authority [28]   |
| <b>Mental Health</b><br><i>(iv)</i>   | Satisfaction with quantity of open space (by district)                                       | Civic Exchange [29]       |
|                                       | Satisfaction with trees, plants and landscaping (by district)                                |                           |
|                                       | Satisfaction with beauty of open space (by district)                                         |                           |

*(ii) Standard Score Approach (S.S.A.) approach; (iv) Directly from official documents available.*

**Table S2.** Determination of score range of Liveability and Health Indicators that adopted the Standard Score Approach (S.S.A.), based on previous literature and the consideration of local contexts in Hong Kong.

| <u>Range of scores</u> | <u>Level of importance in connecting Liveability and Health</u>  | <u>Indicators</u>                                                                                                                                                                                                                                                                                                                                                                                                                                                                                                      |
|------------------------|------------------------------------------------------------------|------------------------------------------------------------------------------------------------------------------------------------------------------------------------------------------------------------------------------------------------------------------------------------------------------------------------------------------------------------------------------------------------------------------------------------------------------------------------------------------------------------------------|
| 1 to 10                | N/A<br>(Due to the satisfactory performance of all 18 districts) | N/A                                                                                                                                                                                                                                                                                                                                                                                                                                                                                                                    |
| 2 to 10                | The indicator is the most significant within local context       | <ul style="list-style-type: none"> <li>• Number of specialist outpatient (clinical) attendances by major specialty and cluster/clinic, 2019-20</li> <li>• Number of general outpatient attendances by cluster/clinic, 2019-20</li> <li>• Family medicine specialist clinic attendances by cluster/clinic, 2019-20</li> <li>• Number of patient days by cluster/hospital, 2019-20</li> </ul>                                                                                                                            |
| 3 to 10                | The indicator is highly important within local context           | <ul style="list-style-type: none"> <li>• Median rent to income ratio (%)</li> <li>• Population density (people/ km<sup>2</sup>)</li> <li>• Working hours (% of people with 45-54 hours, 55-64 hours and over 65 hours of working hours)</li> <li>• Median floor area of accommodation (m<sup>2</sup>)</li> <li>• Death statistics (average figure in 2016, 2017, and 2018)</li> </ul>                                                                                                                                  |
| 4 to 10                | The indicator is of medium importance within local context       | <ul style="list-style-type: none"> <li>• Poverty rate (%)</li> <li>• Noise pollution (% of people exposed to traffic noise exceeding 70 dB)</li> <li>• PM<sub>2.5</sub> concentration (µg/m<sup>3</sup>)</li> <li>• NO<sub>2</sub> concentration (µg/m<sup>3</sup>)</li> <li>• O<sub>3</sub> concentration (µg/m<sup>3</sup>)</li> <li>• Average temperature (°C)</li> <li>• Walking as main mode of transport to place of work (for working population with fixed place of work) (% of working population)</li> </ul> |

|         |                                                                             |                                                                                                                                                                               |
|---------|-----------------------------------------------------------------------------|-------------------------------------------------------------------------------------------------------------------------------------------------------------------------------|
| 5 to 10 | The indicator is of minimal significance within the local context           | <ul style="list-style-type: none"> <li>• Labor force participation rate (%)</li> <li>• Death statistics (external causes) (average figure in 2016, 2017, and 2018)</li> </ul> |
| 6 to 10 | The indicator is the least significant/influential within the local context | N/A                                                                                                                                                                           |
| 7 to 10 | N/A                                                                         | N/A                                                                                                                                                                           |
| 8 to 10 | (Failure to obtain a sharp distribution of scores)                          |                                                                                                                                                                               |
| 9 to 10 |                                                                             |                                                                                                                                                                               |

**Table S3.** Statistical parameters obtained from the best-fit line between each LHI-HK Liveability Indicator versus Overall Health Score, and the respective multiplying factors imposed to each of these indicators in Case Study 3 (See Section 2.3.4 and Table 1), after local contexts are being considered.

| <u>Categories</u>                 | <u>LHI-HK Liveability Indicator</u>                                                                                                                                                                                             | <u>Slope</u> | <u>R value</u> | <u>Multiplying Factor</u><br><u>(Case Study 3)</u> |
|-----------------------------------|---------------------------------------------------------------------------------------------------------------------------------------------------------------------------------------------------------------------------------|--------------|----------------|----------------------------------------------------|
| <i>Education</i>                  | Educational characteristics (percentage of post-secondary education: degree) (both sexes) (%)                                                                                                                                   | 0.65         | 0.378          | <b>4</b>                                           |
| <i>Economy</i>                    | Median monthly household income from all households (HK\$)                                                                                                                                                                      | 0.50         | 0.417          | <b>5</b>                                           |
|                                   | Labor force participation rate (%)                                                                                                                                                                                              | 0.48         | 0.353          | <b>4</b>                                           |
|                                   | Poverty rate (%)                                                                                                                                                                                                                | 0.68         | 0.410          | <b>5</b>                                           |
|                                   | Working hours (% of people with 45-54 hours, 55-64 hours and over 65 hours of working hours)                                                                                                                                    | 0.01         | 0.00002        | <b>5</b>                                           |
| <i>Housing</i>                    | Median floor area of accommodation (m <sup>2</sup> )                                                                                                                                                                            | 0.92         | 0.536          | <b>6</b>                                           |
|                                   | Median rent to income ratio (%)                                                                                                                                                                                                 | -0.55        | -0.272         | <b>5</b>                                           |
|                                   | Proportion of domestic households owning the quarters they occupy (%)                                                                                                                                                           | 0.36         | 0.268          | <b>3</b>                                           |
| <i>Transport/<br/>Walkability</i> | Proportion of working population with place of work in same district of residence (%)                                                                                                                                           | -0.19        | -0.116         | <b>1</b>                                           |
|                                   | Walking as main mode of transport to place of work (for working population with fixed place of work) (% of working population using walking as main mode of transport to place of work given that their place of work is fixed) | 0.17         | 0.114          | <b>2</b>                                           |
| <i>Environment</i>                | Population density (people / km <sup>2</sup> )                                                                                                                                                                                  | 0.93         | 0.461          | <b>5</b>                                           |
|                                   | Number of old and valuable trees                                                                                                                                                                                                | 0.28         | 0.113          | <b>2</b>                                           |
|                                   | Noise pollution (% of people exposed to traffic noise exceeding 70 dB)                                                                                                                                                          | 0.21         | 0.123          | <b>2</b>                                           |
|                                   | Number of greening and landscape assets                                                                                                                                                                                         | 0.21         | 0.136          | <b>2</b>                                           |
|                                   | PM <sub>2.5</sub> concentration (µg/m <sup>3</sup> )                                                                                                                                                                            | 0.22         | 0.176          | <b>2</b>                                           |
|                                   | NO <sub>2</sub> concentration (µg/m <sup>3</sup> )                                                                                                                                                                              | 0.57         | 0.384          | <b>5</b>                                           |
|                                   | O <sub>3</sub> concentration (µg/m <sup>3</sup> )                                                                                                                                                                               | -0.38        | -0.253         | <b>5</b>                                           |
|                                   | Average temperature (°C)                                                                                                                                                                                                        | -0.04        | -0.03          | <b>1</b>                                           |
| <i>Health<br/>Facilities</i>      | Number of hospitals, specialist outpatient clinics, and general outpatient clinics under the Hospital Authority (HA)                                                                                                            | -0.72        | -0.410         | <b>1</b>                                           |
|                                   | Total length of walking tracks (m)                                                                                                                                                                                              | 0.05         | 0.0245         | <b>1</b>                                           |
|                                   | Total number of sports facilities                                                                                                                                                                                               | -0.82        | -0.461         | <b>1</b>                                           |

**Table S4.** Overall normalized liveability scores of all 18 districts of Hong Kong in 2016 and 2019, together with the changes and percentage changes of scores, and changes in rankings from 2016 to 2019.

| District                       | $L_{2016,N}$ | $L_{2019,N}$ | $\Delta L_N$ | $\Delta PC_L$ (%) | $\Delta R_L$ |
|--------------------------------|--------------|--------------|--------------|-------------------|--------------|
| <b><u>Hong Kong Island</u></b> |              |              |              |                   |              |
| Central and Western            | 73.64        | 72.62        | -1.02        | -1.39             | -            |
| Eastern                        | 67.86        | 69.27        | +1.41        | +2.08             | -            |
| Southern                       | 71.83        | 72.35        | +0.52        | +0.72             | +1           |
| Wan Chai                       | 70.41        | 69.94        | -0.47        | -0.67             | -            |
| <b><u>Kowloon</u></b>          |              |              |              |                   |              |
| Kowloon City                   | 64.89        | 66.05        | +1.16        | +1.79             | +2           |
| Kwun Tong                      | 52.84        | 52.49        | -0.35        | -0.66             | -            |
| Sham Shui Po                   | 55.73        | 57.60        | +1.87        | +3.36             | -            |
| Wong Tai Sin                   | 55.70        | 57.27        | +1.57        | +2.82             | -            |
| Yau Tsim Mong                  | 61.34        | 62.04        | +0.70        | +1.14             | -            |
| <b><u>New Territories</u></b>  |              |              |              |                   |              |
| Islands                        | 77.40        | 75.57        | -1.83        | -2.36             | -1           |
| Kwai Tsing                     | 60.16        | 60.70        | +0.54        | +0.90             | -            |
| North                          | 65.77        | 66.63        | +0.86        | +1.31             | +2           |
| Sai Kung                       | 74.03        | 76.08        | +2.05        | +2.77             | +1           |
| Sha Tin                        | 71.73        | 70.96        | -0.77        | -1.07             | -            |
| Tai Po                         | 65.88        | 65.01        | -0.87        | -1.32             | -2           |
| Tsuen Wan                      | 72.01        | 72.06        | +0.05        | +0.07             | -1           |
| Tuen Mun                       | 67.26        | 64.71        | -2.55        | -3.79             | -4           |
| Yuen Long                      | 65.57        | 66.53        | +0.96        | +1.46             | +2           |

$L_{2016,N}$ : Normalized Liveability score in 2016;  $L_{2019,N}$ : Normalized Liveability score in 2019;  $\Delta L_N$ : Change in Normalized Liveability score from 2016 to 2019;  $\Delta PC_L$ : Percentage change in scores from 2016 to 2019;  $\Delta R_L$ : Change in Ranking from 2016 to 2019

\*All numerical figures are corrected to 2 decimal places, and the normalized liveability scores in both 2016 and 2019 are out of 100.

**Table S5.** The categorization of 21 LHI-HK liveability indicators for the liveability assessment prescribed by The California Healthy Places Index (HPI) (i.e., with 8 action areas). Corresponding weighting scheme of HPI framework is as shown.

| <b><u>The California Healthy Places Index (HPI)</u></b><br><b><u>Action Areas</u></b> | <b><u>Indicators (based on LHI-HK framework)</u></b>                                                                                                                                                                                                                                                                                                                                                                                           | <b><u>Weighting (%)</u></b> |
|---------------------------------------------------------------------------------------|------------------------------------------------------------------------------------------------------------------------------------------------------------------------------------------------------------------------------------------------------------------------------------------------------------------------------------------------------------------------------------------------------------------------------------------------|-----------------------------|
| <i>Economic</i>                                                                       | <ul style="list-style-type: none"> <li>• Median monthly household income from all households (HK\$)</li> <li>• Labor force participation rate (%)</li> <li>• Poverty rate (%)</li> </ul>                                                                                                                                                                                                                                                       | <b>32</b>                   |
| <i>Social</i>                                                                         | <ul style="list-style-type: none"> <li>• Working hours (% of people with 45–54 hours, 55–64 hours and over 65 hours of working hours)</li> </ul>                                                                                                                                                                                                                                                                                               | <b>10</b>                   |
| <i>Education</i>                                                                      | <ul style="list-style-type: none"> <li>• Educational characteristics (percentage of citizens having post-secondary education: degree) (both sexes) (%)</li> </ul>                                                                                                                                                                                                                                                                              | <b>19</b>                   |
| <i>Transportation</i>                                                                 | <ul style="list-style-type: none"> <li>• Walking as main mode of transport to place of work (for working population with fixed place of work) (% of working population using walking as main mode of transport to place of work, given that their place of work is fixed)</li> </ul>                                                                                                                                                           | <b>16</b>                   |
| <i>Neighborhood</i>                                                                   | <ul style="list-style-type: none"> <li>• Proportion of working population with place of work in the same district of residence (%)</li> <li>• Total length of walking track (m)</li> <li>• Total number of sports facilities</li> <li>• Population density (people/km<sup>2</sup>)</li> </ul>                                                                                                                                                  | <b>8</b>                    |
| <i>Housing</i>                                                                        | <ul style="list-style-type: none"> <li>• Median floor area of accommodation (m<sup>2</sup>)</li> <li>• Median rent to income ratio (%)</li> <li>• Proportion of domestic households owning the quarters they occupy (%)</li> </ul>                                                                                                                                                                                                             | <b>5</b>                    |
| <i>Clean Environment</i>                                                              | <ul style="list-style-type: none"> <li>• Number of old and valuable trees</li> <li>• Noise pollution (% of people exposed to traffic noise exceeding 70dB)</li> <li>• Number of greening and landscape assets</li> <li>• PM<sub>2.5</sub> concentration (µg/m<sup>3</sup>)</li> <li>• NO<sub>2</sub> concentration (µg/m<sup>3</sup>)</li> <li>• O<sub>3</sub> concentration (µg/m<sup>3</sup>)</li> <li>• Average temperature (°C)</li> </ul> | <b>5</b>                    |
| <i>Healthcare</i>                                                                     | <ul style="list-style-type: none"> <li>• Number of hospitals, specialist outpatient clinics, and general outpatient clinics under the Hospital Authority (HA)</li> </ul>                                                                                                                                                                                                                                                                       | <b>5</b>                    |



## References

1. Census and Statistics Department. Population and Household Statistics Analysed by District Council District (2016 Edition). Available online: <https://www.censtatd.gov.hk/en/EIndexbySubject.html?pcode=B1130301&scode=150>
2. Census and Statistics Department. Population and Household Statistics Analysed by District Council District (2019 Edition). Available online: <https://www.censtatd.gov.hk/en/EIndexbySubject.html?pcode=B1130301&scode=150>
3. Census and Statistics Department. Hong Kong Poverty Situation Report 2016. Available online: [https://www.povertyrelief.gov.hk/eng/pdf/Hong\\_Kong\\_Poverty\\_Situation\\_Report\\_2016\(2017.11.17\).pdf](https://www.povertyrelief.gov.hk/eng/pdf/Hong_Kong_Poverty_Situation_Report_2016(2017.11.17).pdf)
4. Census and Statistics Department. Hong Kong Poverty Situation Report 2019. Available online: [https://www.povertyrelief.gov.hk/eng/pdf/Hong\\_Kong\\_Poverty\\_Situation\\_Report\\_2019.pdf](https://www.povertyrelief.gov.hk/eng/pdf/Hong_Kong_Poverty_Situation_Report_2019.pdf)
5. Census and Statistics Department. 2016 Population by-census. District Profiles. Available online: <https://www.bycensus2016.gov.hk/en/bc-dp.html>
6. Census and Statistics Department. 2011 Population by-census. Available online: <https://www.censtatd.gov.hk/en/scode170.html>
7. Census and Statistics Department & Centamap. Centamap 2016 Population By-census. Available online: <http://census.centamap.com>
8. Census and Statistics Department, Table E489: Land area, mid-year population and population density by District Council district, 2019. Available online: <https://www.censtatd.gov.hk/en/EIndexbySubject.html?pcode=D5320189&scode=150>
9. Development Bureau. Old and Valuable Trees in Hong Kong. Listing - By District. Available online: <https://www.greening.gov.hk/ovt/listing.aspx?t=2>
10. Environmental Protection Department. Spatial Distribution of Traffic Noise Problem in Hong Kong. Population Exposed to Traffic Noise > 70dB(A)L10 - All Districts. Available online: [https://www.epd.gov.hk/epd/misc/noisemodel1/CDROM\\_L10/default.html](https://www.epd.gov.hk/epd/misc/noisemodel1/CDROM_L10/default.html)
11. Development Bureau. Tree and Landscape Map. Available online: [https://www.greening.gov.hk/en/knowledge\\_database/map.html](https://www.greening.gov.hk/en/knowledge_database/map.html)
12. Environmental Protection Department. Air Pollutant Concentrations ( $\mu\text{g}/\text{m}^3$ ): Data & Statistics. Available online: [https://www.epd.gov.hk/epd/english/environmentinhk/air/data/air\\_data.html](https://www.epd.gov.hk/epd/english/environmentinhk/air/data/air_data.html)
13. HKUST, Environmental Central Facility of Institute for the Environment. ENVF Atmospheric and Environmental Database. Available online: <http://envf.ust.hk/dataview/share/3.2/overview.html>
14. Hospital Authority. Hospital Authority Statistical Report 2016-2017. Available online: <https://www3.ha.org.hk/data/HAStatistics/DownloadReport/2>
15. Hospital Authority. Hospital Authority Statistical Report 2018-2019. Available online: <https://www3.ha.org.hk/Data/HAStatistics/StatisticalReport>
16. Leisure and Cultural Services Department. Be Smart and Healthy, Let's Take a Brisk Walk Daily. Available online: <https://www.lcsd.gov.hk/en/sportforall/fitness.html#11>
17. Hong Kong Geodata Store. Grass Pitches, from Leisure and Cultural Services Department. Available online: <https://geodata.gov.hk/gs/view-dataset?fromIndex=0&sindex=0&searchable1=&lang=ALL&filter=1&uuid=5054697b-fd48-43cd-8369-c5a6fa61e1c2>
18. Hong Kong Geodata Store. Badminton Courts, from Leisure and Cultural Services Department. Available online: <https://geodata.gov.hk/gs/view-dataset?fromIndex=0&sindex=0&searchable1=&lang=ALL&filter=1&uuid=f9ca5378-c23d-4c9c-9ea5-198c40298fd7>
19. Hong Kong Geodata Store. Basketball Courts, from Leisure and Cultural Services Department. Available online: <https://geodata.gov.hk/gs/view-dataset?fromIndex=0&sindex=0&searchable1=&lang=ALL&filter=1&uuid=fb65b9aa-05d9-4768-a8b1-148072180ba1>
20. Hong Kong Geodata Store. Fitness Rooms, from Leisure and Cultural Services Department. Available online: <https://geodata.gov.hk/gs/view->

[dataset?fromIndex=0&sindex=0&searchable1=&lang=ALL&filter=1&uuid=59a2216c-7051-4965-818a-2a323cc79205](https://geodata.gov.hk/gs/view-dataset?fromIndex=0&sindex=0&searchable1=&lang=ALL&filter=1&uuid=59a2216c-7051-4965-818a-2a323cc79205)

21. Hong Kong Geodata Store. Hard-surface Pitches, from Leisure and Cultural Services Department. Available online: <https://geodata.gov.hk/gs/view-dataset?fromIndex=0&sindex=0&searchable1=&lang=ALL&filter=1&uuid=e12e1f78-58c8-4eeb-ae83-bc2fa72edd91>
22. Hong Kong Geodata Store. Swimming Pools, from Leisure and Cultural Services Department. Available online: <https://geodata.gov.hk/gs/view-dataset?fromIndex=0&sindex=0&searchable1=&lang=ALL&filter=1&uuid=5d60a82e-54bf-4872-922f-f949567094fe>
23. Hong Kong Geodata Store. Table Tennis Tables, from Leisure and Cultural Services Department. Available online: <https://geodata.gov.hk/gs/view-dataset?fromIndex=0&sindex=0&searchable1=&lang=ALL&filter=1&uuid=5c080cec-4777-43b7-8476-81ea6462f834>
24. Department of Health. Death Statistics - by sex, age and residential district, causes of death in tabulation list of the International Classification of Diseases (from 2001 onwards). Available online: [https://www.healthyhk.gov.hk/phishweb/enquiry/mo\\_ysad10\\_e.html](https://www.healthyhk.gov.hk/phishweb/enquiry/mo_ysad10_e.html)
25. Department of Health. Death Statistics (External Causes) - by sex, age and residential district, causes of death in tabulation list of the International Classification of Diseases (from 2001 onwards). Available online: [https://www.healthyhk.gov.hk/phishweb/enquiry/mo\\_ysad10x\\_e.html](https://www.healthyhk.gov.hk/phishweb/enquiry/mo_ysad10x_e.html)
26. Hospital Authority. Number of Specialist Outpatient (Clinical) Attendances by Major Specialty and Cluster / Clinic, 2019-20. Available online: <https://www3.ha.org.hk/Data/HAStatistics/MajorReport>
27. Hospital Authority. Number of General Outpatient Attendances, Family Medicine Specialist Clinic Attendances and Primary Care Attendances by Cluster / Clinic, 2019-20. Available online: <https://www3.ha.org.hk/Data/HAStatistics/MajorReport>
28. Hospital Authority. Number of Patient Days by Cluster / Hospital, 2019-20. Available online: <https://www3.ha.org.hk/Data/HAStatistics/MajorReport>
29. Lai, C. Open Space Opinion Survey (Summary Report), 2018 Research Report. Civic Exchange. Available online: <https://civic-exchange.org/report/open-space-opinion-survey-summary-report/>
